# Supplementary material
Source: PubMed Central journal article supplement (PMC7528337)
Supplement: ao0c03044_si_001.pdf [file ao0c03044_si_001.pdf]

# Preparation of new biocomposite designed for cartilage grafting with anti-biofilm activity

Sara Targonska<sup>1</sup>, Justyna Rewak-Sorczynska<sup>1</sup>, Agata Piecuch<sup>2</sup>, Emil Paluch<sup>3</sup>, Damian Szymanski<sup>1</sup> and Rafal J. Wiglusz<sup>1,\*</sup>

<sup>1</sup>*Institute of Low Temperature and Structure Research, Polish Academy of Sciences, Okolna 2, 50-422 Wroclaw, Poland*

<sup>2</sup>*Institute of Genetics and Microbiology, University of Wroclaw, Przybyszewskiego 63/77, 51-148 Wroclaw, Poland*

<sup>3</sup>*Department of Microbiology, Faculty of Medicine, Wroclaw Medical University  
Tytusa Chalubinskiego 4, 50-376 Wroclaw, Poland*

**Keywords:** Polymer-inorganic composites; PTFE polymer; Nanoapatites; Ag<sup>+</sup> ions; Cytotoxicity; Antibacterial properties

\*Corresponding authors:

E-mail: [r.wiglusz@intibs.pl](mailto:r.wiglusz@intibs.pl)

Phone: +48(071)3954159

Fax: +48(071)3441029

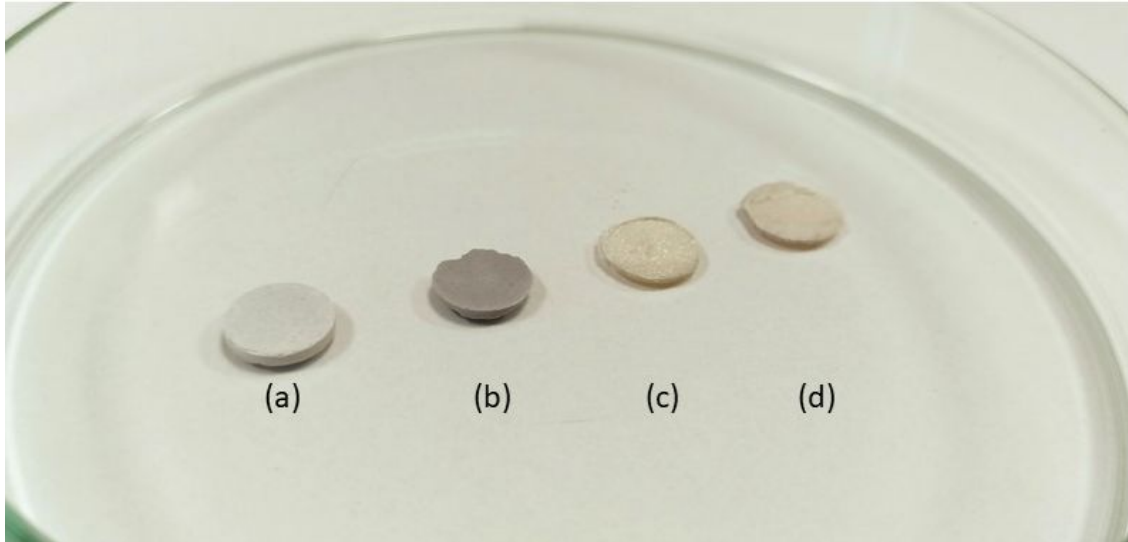

**Figure S1.** Representative pellets of (a) 5.0 mol% Ag<sup>+</sup>:HAp; (b) 5.0 mol% Ag<sup>+</sup>:FAP; and tetrafluoroethylene with (c) 10 wt.% of hydroxyapatite (PTFE@Ag<sup>+</sup>:10HAp) and (d) 10 wt.% of fluorapatite (PTFE@Ag<sup>+</sup>:10FAP) composites.

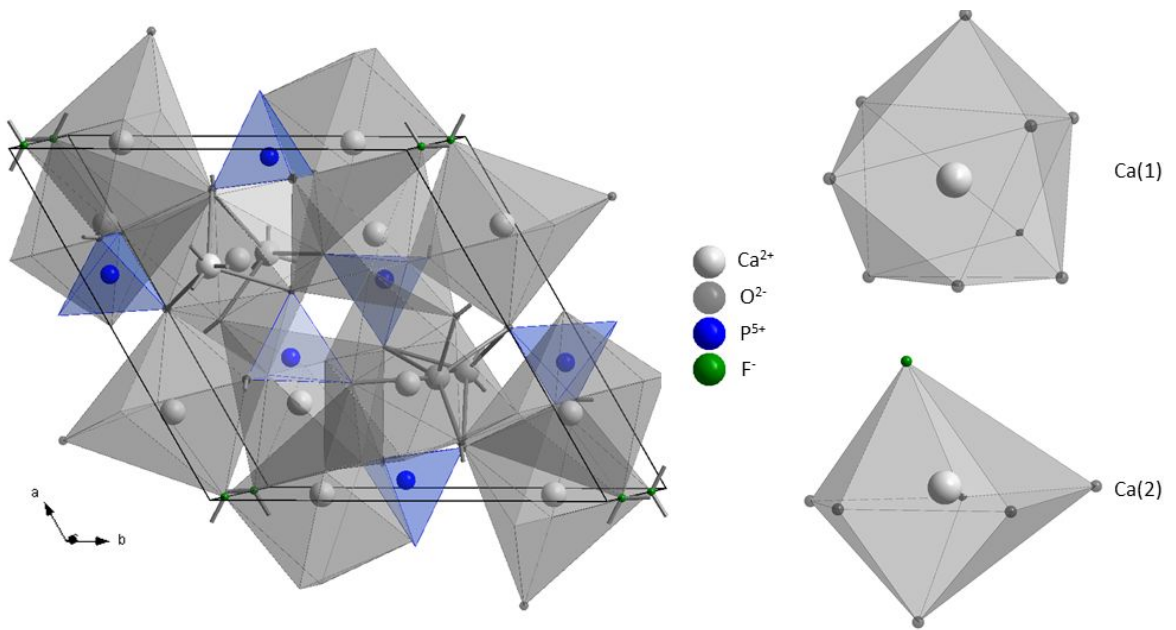

**Figure S2.** View of the unit cell of fluorapatite crystal along [001] and coordination polyhedron of Ca<sup>2+</sup> cations in the crystal structure of the fluorapatite.

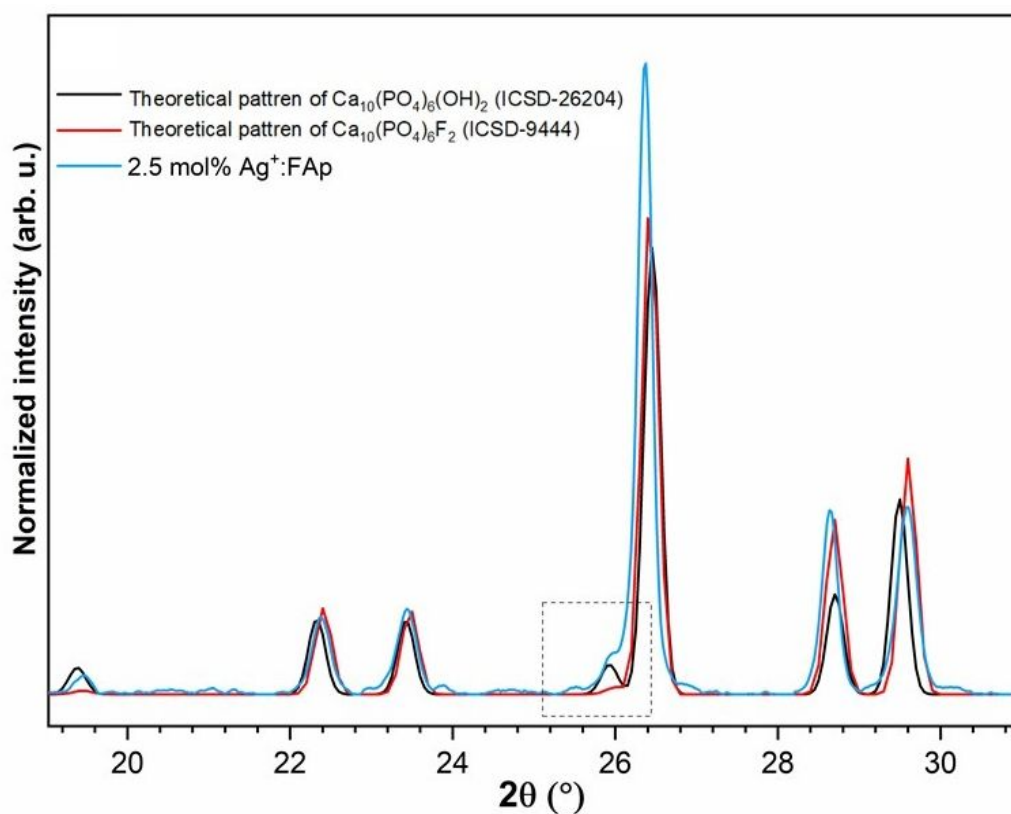

**Figure S3.** X-ray diffraction correlation of 2.5 mol% Ag<sup>+</sup>:FAp with hydroxyapatite and flourapatite.

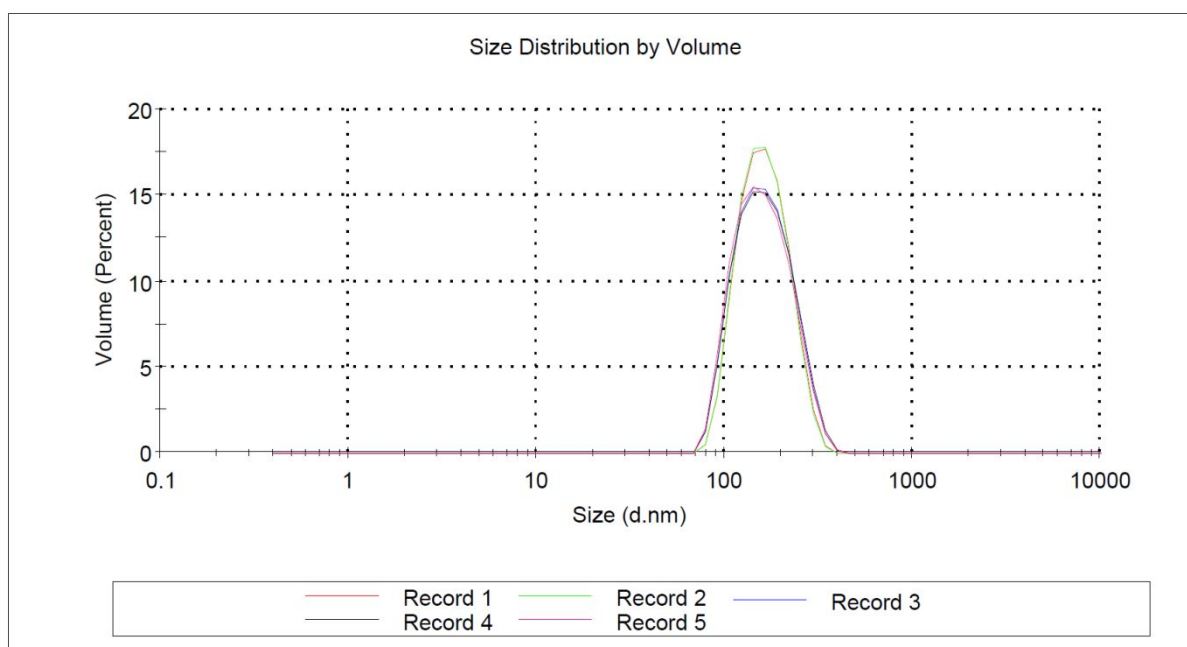

**Figure S4.** The particle size distribution of dispersed poly(tetrafluoroethylene) PTFE in deionized water.

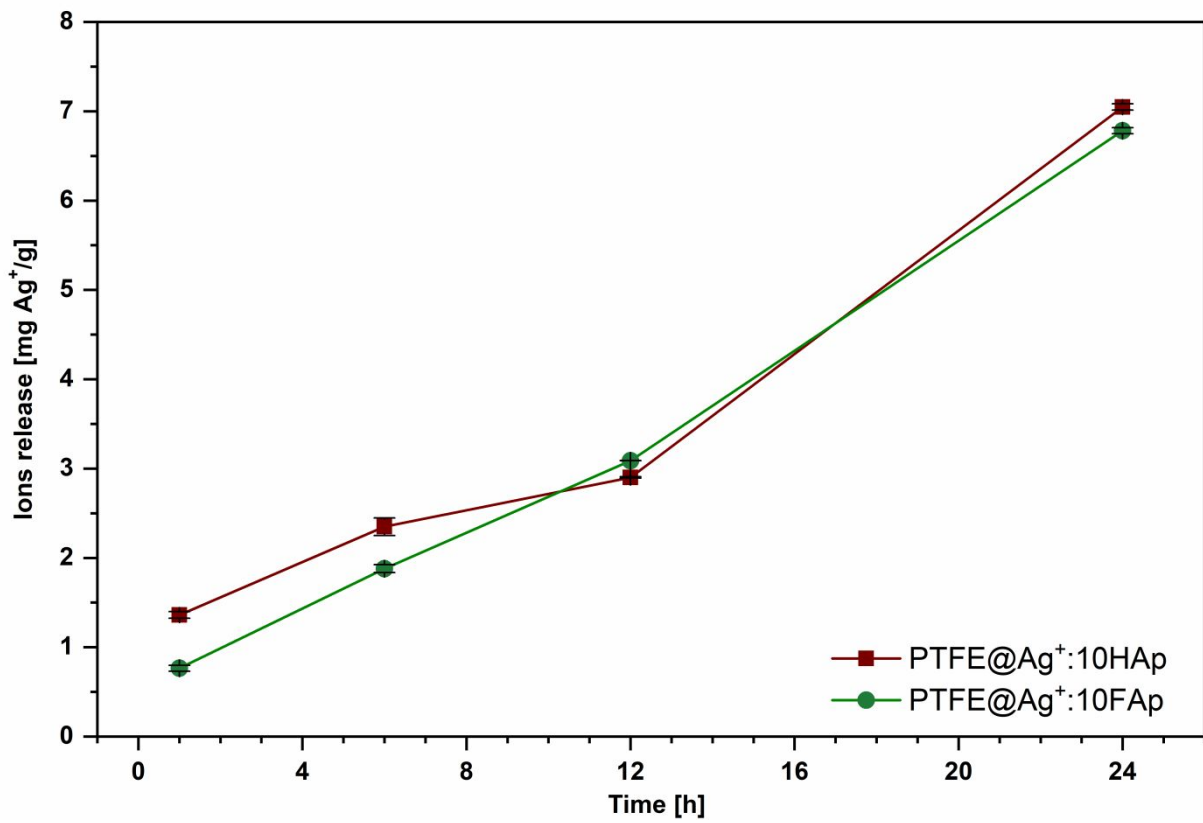

**Figure S5.** The Ag<sup>+</sup> release from tetrafluoroethylene composites with 10 wt.% of hydroxyapatite and 10 wt.% of fluorapatite.

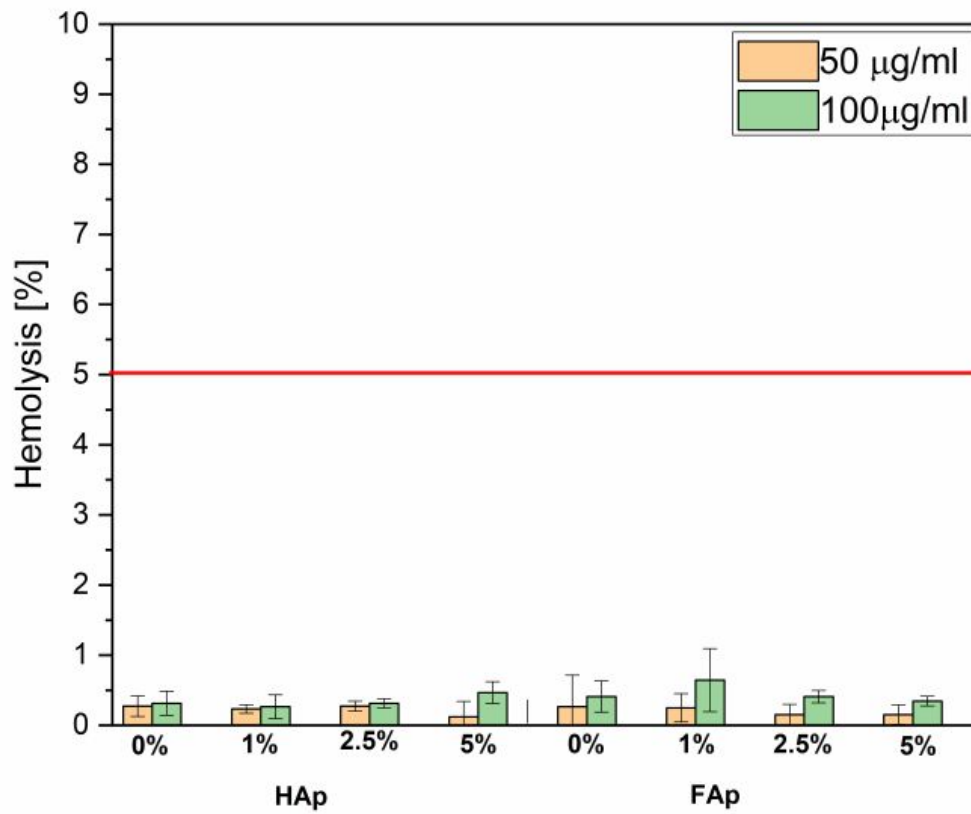

**Figure S6.** Hemolysis caused by HAp/FAp doped with 1, 2.5 and 5 mol% of Ag<sup>+</sup> compared to hemolysis caused by 1 % SDS (mean ± SD, n=3; all results were statistically significant (p<0.05). The red line indicates the acceptable hemolysis level.
